# Supplementary material for: Whole-Genome-Sequence-Based Haplotypes Reveal Single Origin of the Sickle Allele during the Holocene Wet Phase
Source: PubMed Central journal article supplement — Am J Hum Genet. 2018 Mar 8;102(4):547–56. doi: 10.1016/j.ajhg.2018.02.003 (PMC5985360; doi:10.1016/j.ajhg.2018.02.003), 2018-03-08
Supplement: mmc1.pdf [file mmc1.pdf]

**The American Journal of Human Genetics, Volume 102**

**Supplemental Data**

**Whole-Genome-Sequence-Based Haplotypes  
Reveal Single Origin of the Sickle Allele  
during the Holocene Wet Phase**

**Daniel Shriner and Charles N. Rotimi**

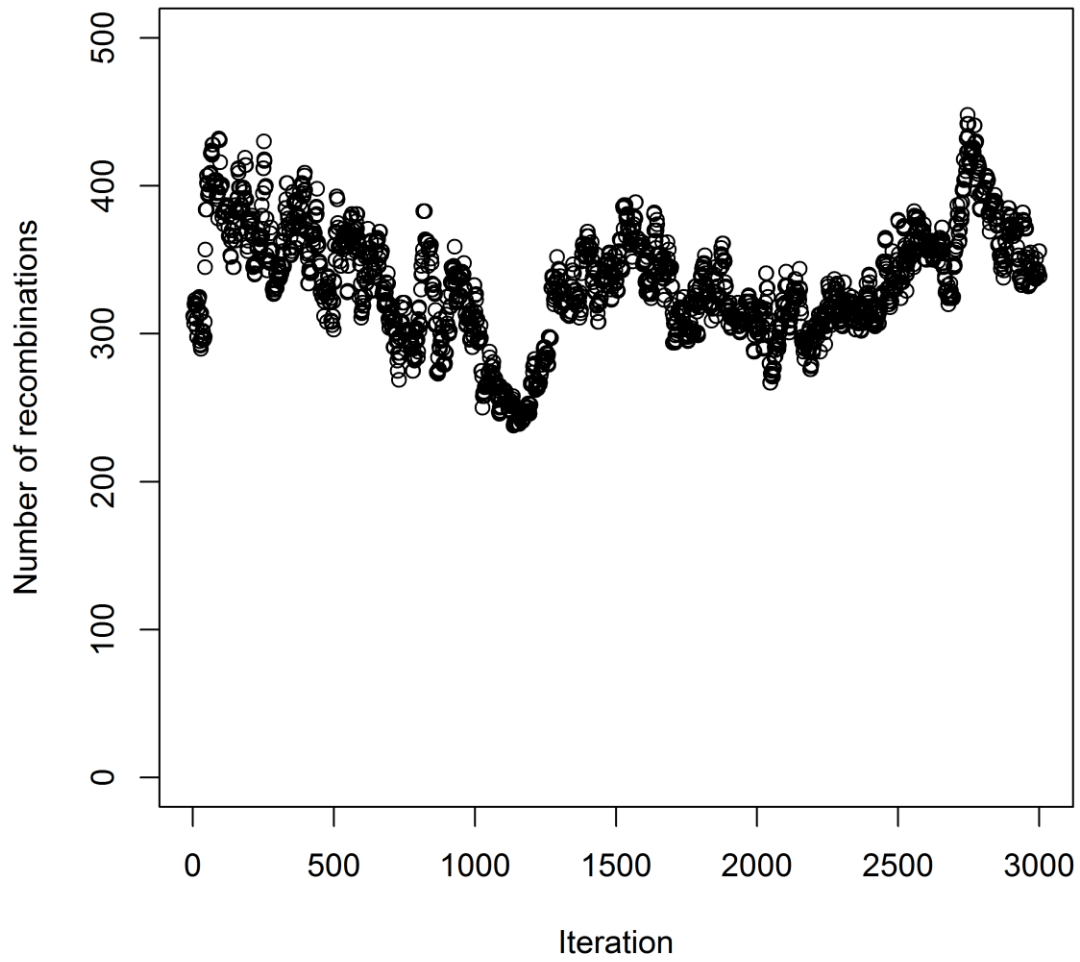

Figure S1. Trace of the number of recombinations. If the target stationary distribution has been reached, then the trace should depict white noise around a horizontal line.
